# Supplementary material for: Identification of Human Dihydroorotate Dehydrogenase Inhibitor by a Pharmacophore-Based Virtual Screening Study
Source: MDPI journal article supplement (doi:10.3390/molecules27123660), 2022-06-07
Supplement: s1 [file s1]

## Supporting Information

# Identification of Human Dihydroorotate Dehydrogenase Inhibitor by a Pharmacophore-Based Virtual Screening Study

Salvatore Galati <sup>1</sup>, Stefano Sainas <sup>2</sup>, Marta Giorgis <sup>2</sup>, Donatella Boschi <sup>2</sup>, Marco L. Lolli <sup>2</sup>, Gabriella Ortore <sup>1</sup>, Giulio Poli <sup>1,\*</sup> and Tiziano Tuccinardi <sup>1</sup>

<sup>1</sup> Department of Pharmacy, University of Pisa, Pisa, Italy

<sup>2</sup> Department of Drug Science and Technology, University of Turin, Via P. Giuria 9, 10125 - Turin, Italy

\*Correspondence: [giulio.poli@unipi.it](mailto:giulio.poli@unipi.it); Tel.: +39-0502219603

### Table of Contents

|                                                                                               |    |
|-----------------------------------------------------------------------------------------------|----|
| <b>Table S1.</b> Validation statistics of the pharmacophore screening.                        | S2 |
| <b>Table S2.</b> MD simulation results for the six analyzed ligand- <i>h</i> DHODH complexes. | S3 |

**Table S1.** Validation statistics of the pharmacophore screening, showing the fraction of actives in both the initial VS library and in the subset of compounds selected by pharmacophore screening.

|                                           | <b>Commercial<br/>compounds</b> | <b>Active<br/>ligands</b> | <b>% actives</b> |
|-------------------------------------------|---------------------------------|---------------------------|------------------|
| Initial pre-filtered<br>compounds library | 409484                          | 524                       | 0.13             |
| Pharmacophore<br>screening results        | 1486                            | 151                       | 9.2              |
| Retained<br>compounds (%)                 | 0.36                            | 29                        |                  |

**Table S2.** Ligand RMSD and H-bond analysis during the MD simulation of the six analyzed ligand-*h*DHODH complexes.

| 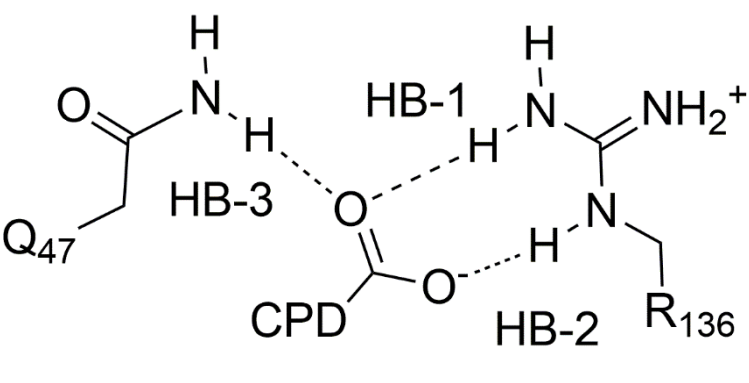 |                     |             |             |             |
|------------------------------------------------------------------------------------|---------------------|-------------|-------------|-------------|
| Compound                                                                           | Average<br>RMSD (Å) | HB-1<br>(%) | HB-2<br>(%) | HB-3<br>(%) |
| CPD1                                                                               | 0.7                 | 100         | 100         | 83          |
| CPD2                                                                               | 1.0                 | 100         | 100         | 67          |
| CPD3                                                                               | 0.8                 | 100         | 100         | 45          |
| CPD4                                                                               | 0.4                 | 100         | 83          | 80          |
| CPD5                                                                               | 0.7                 | 100         | 100         | 81          |
| CPD6                                                                               | 0.5                 | 78          | 90          | 46          |
